# Supplementary material for: The influence of inactivated entomopathogenic bacterium Bacillus thuringiensis on the immune responses of the Colorado potato beetle
Source: PeerJ. 2024 Oct 31;12:e18259. doi: 10.7717/peerj.18259 (PMC11531747; doi:10.7717/peerj.18259)
Supplement: Supplemental Information 1 [file peerj-12-18259-s001.xlsx]

## Sheet: Figure 1
Figure 1. The survival of CPB larvae after per os treatment with suspensions of active (Bt) and inactivated (ABt) entomopathogenic bacteria B. thuringiensis (5 × 10^7 spores and crystals / ml suspension). Sodium chloride solution was used in the control group.
Variants	Replicate	Days posttreatments					Live insects (5th day)	All larvae in box
		1	2	3	4	5
Control	1	0	0	0	0	0	10	10
Control	2	0	0	0	0	0	10	10
Control	3	0	0	0	0	0	9	9
Control	4	0	0	0	0	0	10	10
Control	5	0	0	0	0	0	10	10
Control	6	0	0	0	0	0	10	10
Control	7	0	0	0	0	0	10	10
Control	8	0	0	1	0	1	8	10
Control	9	0	0	0	0	0	10	10
Control	10	1	0	0	0	0	9	10
Control	11	0	0	0	0	0	10	10
Control	12	2	0	0	0	0	8	10
Control	13	0	0	0	0	0	10	10
Control	14	0	0	0	0	0	10	10
Control	15	1	0	1	0	0	8	10
Control	16	0	0	0	0	0	10	10
Control	17	0	0	0	0	3	7	10
Control	18	0	0	0	0	0	10	10
Control	19	0	0	0	0	0	10	10
Control	20	0	0	0	0	0	10	10
Bt	1	0	0	0	3	1	4	8
Bt	2	0	0	2	2	0	5	9
Bt	3	0	1	3	0	3	3	10
Bt	4	0	0	3	1	2	4	10
Bt	5	0	0	3	5	2	0	10
Bt	6	0	4	3	0	3	0	10
Bt	7	0	1	5	0	3	1	10
Bt	8	0	2	6	0	2	0	10
Bt	9	0	1	1	3	0	5	10
Bt	10	0	0	2	3	0	5	10
Bt	11	0	0	0	1	1	8	10
Bt	12	0	0	2	0	2	6	10
Bt	13	0	0	1	2	2	5	10
Bt	14	0	2	1	0	5	2	10
Bt	15	0	0	1	0	1	8	10
Bt	16	0	0	0	0	1	9	10
Bt	17	0	0	0	0	3	7	10
Bt	18	0	0	2	0	4	4	10
Bt	19	0	1	2	0	1	6	10
Bt	20	0	0	0	0	5	5	10
ABt	1	0	1	0	0	0	9	10
ABt	2	0	0	0	0	0	10	10
ABt	3	0	0	0	0	0	10	10
ABt	4	0	0	0	0	0	8	8
ABt	5	0	0	0	0	0	10	10
ABt	6	0	0	0	0	0	10	10
ABt	7	0	0	0	0	0	10	10
ABt	8	0	0	0	0	0	6	6
ABt	9	0	1	0	0	0	9	10
ABt	10	0	0	0	1	0	9	10
ABt	11	0	1	0	2	0	7	10
ABt	12	0	0	0	0	0	10	10
ABt	13	0	0	0	0	0	10	10
ABt	14	0	0	1	0	0	9	10
ABt	15	0	0	0	0	0	10	10
ABt	16	0	0	0	0	0	10	10
ABt	17	0	0	0	0	0	10	10
ABt	18	0	0	0	0	0	10	10
ABt	19	0	0	0	0	0	10	10
ABt	20	0	0	0	0	0	10	10
ABt	21	0	0	0	0	0	10	10

## Sheet: Figure 2
Figure 2. The dynamics of body weight of CPB larvae after per os treatment with suspensions of active (Bt) and inactivated (ABt) entomopathogenic bacteria B. thuringiensis. Sixty individuals were used in each variant (one replicate=ten larvae).
variant	replicate	Time after treatment (days) and the dynamycs of body weight
		0	1	2	3	4	5
Control	1	0.042	0.08	0.082	0.13	0.135	0.135
Control	2	0.036	0.06	0.075	0.0666667	0.102222	0.10625
Control	3	0.04	0.085	0.088	0.131	0.134	0.141
Control	4	0.041	0.0766667	0.106667	0.124444	0.136667	0.127778
Control	5	0.037	0.069	0.086	0.117	0.148	0.15
Control	6	0.043	0.07375	0.11	0.14125	0.145	0.12875
Bt	1	0.046	0.038	0.03	0.0366667	0.0233333	0
Bt	2	0.051	0.044	0.0344444	0.04	0.035	0.03
Bt	3	0.048	0.041	0.0325	0.03	0.025	0
Bt	4	0.038	0.045	0.0366667	0.03375	0.034	0.04
Bt	5	0.039	0.047	0.0355556	0.03375	0.022	0.03
Bt	6	0.042	0.039	0.04	0.041	0.0355556	0.03875
ABt	1	0.038	0.072	0.0522222	0.108889	0.113333	0.155556
ABt	2	0.039	0.075	0.05	0.075	0.0955556	0.102222
ABt	3	0.043	0.076	0.1	0.0757143	0.104286	0.107143
ABt	4	0.04	0.067	0.099	0.126	0.125	0.125
ABt	5	0.038	0.078	0.118	0.129	0.118	0.108
ABt	6	0.045	0.07	0.1	0.112222	0.12	0.115556

## Sheet: Figure 3
Figure 3. The total hemocyte count and phenoloxidase activity of CPB larvae 24, 24 and 48 hours after per os treatment with suspensions of active (Bt) and inactivated (ABt) entomopathogenic bacteria B. thuringiensis.
Total hemocyte count													Activity of phenoloxidases
12 hours				24 hours				48 hours					12 hours				24 hours				48 hours
Control	Bt	ABt		Control	Bt	ABt		Control	Bt	ABt			Control	Bt	ABt		Control	Bt	ABt		Control	Bt	ABt
9921875	12500000	16875000		13984375	11171875	17343750		14609375	14453125	13750000			0.183818	0.136253	0.14818		0.117504	0.0834647	0.118418		0.265096	0.140856	0.168276
10546875	14453125	16328125		14531250	10234375	19296875		16953125	13984375	13437500			0.0500141	0.0661802	0.0527129		0.195453	0.115796	0.0629925		0.239866	0.0969242	0.0731004
10703125	16953125	16406250		17421875	11171875	17265625		18750000	16015625	14218750			0.12636	0.0949638	0.0764795		0.181367	0.0899291	0.119305		0.190029	0.0749713	0.0897513
10390625	15625000	15781250		14140625	10390625	14531250		16015625	13281250	13125000			0.0357895	0.0775139	0.0562329		0.136935	0.0698926	0.0752007		0.183057	0.264095	0.187335
11484375	14062500	14843750		15390625	11171875	16484375		16796875	13359375	12656250			0.0992978	0.0914653	0.0792138		0.103487	0.134299	0.185001		0.170048	0.244932	0.15735
10000000	17265625	18437500		17968750	12656250	18125000		18281250	15703125	16718750			0.175321	0.0668064	0.0478395		0.148443	0.15772	0.053478		0.151188	0.0690025	0.112553
17265625	14609375	15234375		13359375	12812500	15000000		14921875	13906250	13984375			0.234743	0.1926	0.101104		0.105824	0.168544	0.0601242		0.234472	0.0855105	0.0645418
12812500	15546875	16328125		14218750	13750000	15625000		14375000	15468750	15625000			0.102398	0.0835297	0.0427889		0.182954	0.155944	0.113356		0.189932	0.258175	0.168445
11171875	16328125	16171875		18515625	12031250	19531250		15312500	17734375	16718750			0.112536	0.10224	0.058287		0.150676	0.088307	0.112182		0.181361	0.14865	0.0751954
13593750	18437500	13046875		12656250	11562500	16406250		12109375	16406250	14765625			0.0916991	0.0946612	0.0496121		0.125318	0.144778	0.0881869		0.100135	0.0628087	0.177207
													0.0758678	0.131368	0.105714		0.156622	0.190618	0.132116		0.0986082	0.228583	0.170741
													0.0526172	0.0604884	0.0988002		0.0972515	0.177813	0.109448		0.198843	0.170648	0.084727
													0.060241	0.0676238	0.0503782		0.161948	0.114094	0.0696428		0.207106	0.14969	0.0623595
													0.0757882	0.0632789	0.113882		0.0998594	0.101675	0.0445696		0.119519	0.0565455	0.0651954
													0.10467	0.0315194	0.0587862		0.151645	0.0611074	0.116445		0.081898	0.0759558	0.171373
													0.0559236	0.10898	0.0813618		0.0954451	0.188101	0.129044		0.234566	0.102847	0.0814268
													0.0492527	0.125448	0.113728		0.17814	0.0999896	0.0925714		0.222413	0.0576449	0.120539
														0.089609	0.0467436				0.167754			0.0831582
															0.0301274

## Sheet: Figure 4
Figure 4. Activity of glutathione-S-transferase and nonspecific esterase in the hemolymph, fat body and midgut of CPB larvae 12, 24 and 48 hours after per os treatment with suspensions of active (Bt) and inactivated (ABt) entomopathogenic bacteria B. thuringiensis.
Activity of nonspecific esterases in hemolymph													Activity of glutation-s-transferases in hemolymph
12 hours				24 hours				48 hours					12 hours				24 hours				48 hours
Control	Bt	ABt		Control	Bt	ABt		Control	Bt	ABt			Control	Bt	ABt		Control	Bt	ABt		Control	Bt	ABt
0.770754	0.717428	1.14958		0.737404	0.600923	0.84384		0.631501	0.441352	0.491865			0.103755	0.452494	0.261626		0.355732	0.128769	0.10599		0.195371	0.15272	0.42146
0.971968	1.20489	0.832052		1.57848	0.509109	0.634337		0.556834	0.20169	0.496721			0.303254	0.473693	0.331864		0.408227	0.0697668	0.189477		0.258879	0.357986	0.228912
0.757978	0.630341	1.14489		1.40827	0.384023	0.822506		0.324832	0.478198	0.592399			0.111833	0.586914	0.349112		0.323073	0.0329717	0.239725		0.252109	0.238656	0.310533
1.06139	1.64618	1.00859		0.967495	0.571771	0.381852		0.437399	0.454597	0.353103			0.0816451	0.448261	0.310177		0.240853	0.084084	0.132818		0.155714	0.171919	0.304926
0.88326	1.13781	0.888712		0.314961	0.747858	0.672763		0.807567	0.438132	0.226536			0.301267	0.52326	0.306266		0.0958576	0.0872501	0.0830572		0.164858	0.120742	0.282055
0.585416	0.685133	1.15816		0.640192	0.77848	0.477379		0.288442	0.258215	0.248325			0.418467	0.398508	0.49528		0.123246	0.206068	0.124534		0.168258	0.154753	0.219775
1.03222	1.44066	0.577864		0.380108	0.625793	0.565481		0.496224	0.247187	0.414898			0.317345	0.247656	0.57659		0.272004	0.142226	0.10319		0.195364	0.144651	0.364684
1.0991	1.60882	1.3316		0.646299	0.845002	1.31531		0.345033	0.429393	0.481085			0.239986	0.614898	0.634068		0.116102	0.21705	0.272835		0.10581	0.326492	0.168647
0.471696	1.01852	0.651424		0.599964	0.338898	0.771751		0.501329	0.242247	0.596586			0.177127	0.767602	0.189423		0.21516	0.143941	0.514501		0.241712	0.201135	0.117428
0.390485	1.06379	1.12823		0.797073	0.675334	0.582713		0.351394	0.233951	0.287373				0.413272			0.289845	0.273153	0.0702562		0.13302	0.151703	0.201852
Activity of nonspecific esterases in fat body													Activity of glutation-s-transferases in fat body
12 hours				24 hours				48 hours					12 hours				24 hours				48 hours
Control	Bt	ABt		Control	Bt	ABt		Control	Bt	ABt			Control	Bt	ABt		Control	Bt	ABt		Control	Bt	ABt
1.04389	1.5884	0.796987		0.860055	0.971296	1.2338		0.830255	0.0947645	1.01546			1.5033	1.28205	1.19567		1.40633	1.11472	2.79574		1.89246	0.557344	1.90312
1.45334	1.72323	1.49621		0.812181	0.368065	1.4857		1.12161	1.32726	0.603369			1.54826	0.852996	0.597009		2.0165	0.319258	2.96048		1.55505	1.17184	1.1768
1.61929	1.60648	0.436325		0.975055	0.837076	1.08832		0.430458	0.772901	0.939132			1.4298	1.63763	0.85759		1.55332	1.11482	2.08353		1.1289	1.23477	1.83745
0.744426	1.47079	1.32759		1.10575	0.693804	1.28152		0.788781	1.18811	0.63541			1.23152	1.08499	1.3832		2.17949	0.703893	2.34706		0.92763	0.790703	1.60977
0.623271	1.13844	1.14455		0.706586	0.779956	1.50338		0.274881	0.592987	0.274883			1.04588	1.52225	1.51726		1.1272	0.429621	3.70655		1.27008	0.870208	0.597331
1.285	0.251672	0.879746		1.04685	0.79177	1.29617		0.321842	1.28986	0.550133			1.21524	0.20463	1.38222		1.7838	0.575594	2.39888		0.898485	0.728029	1.10684
1.20717	1.04165	0.722273		1.0915	1.16061	1.29083		0.630113	1.24841	0.704708			1.67493	0.649902	1.23946		1.70611	1.48642	2.31334		1.37649	0.864703	1.68588
0.757476	1.55715	0.922686		0.759991	1.17224	0.950514		0.323986	0.860183	0.866788			1.09643	0.527777	1.2942		0.854076	1.60267	1.73659		1.34731	1.10962	1.60829
1.34512	1.04255	1.26755		1.00322	0.469377	1.41405		0.63774	1.18345	1.21055			1.37912	0.817225	1.24768		2.40459	0.578063	3.05323		1.46154	1.16475	2.14954
0.934185	1.30113	0.683866		1.34621	1.06471	0.89063		0.566839	0.565036	0.896087			1.37551	0.474397	1.24418		3.02349	1.94384	1.1598		1.18984	1.04981	2.30233
0.807053	1.41066	1.28879		1.21063	1.14238	1.10322		0.646018	1.23485	0.568136			1.31324	1.02493	1.65412		0.538862	1.78135	1.93647		1.2812	1.41657	0.974225
1.29266	1.44196	1.50076		1.07064	1.32859	0.969988		0.558634	0.730096	0.865042			2.07029	1.32524	1.41446		2.00465	0.975287	1.89662		2.01272	1.12726	1.21431
0.619715	1.52057	1.1084		0.636568	1.10683	1.10798		0.906321	1.4379	0.526284			1.26437	1.04133	0.685251		1.4046	1.30382	2.29943		1.01665	1.20233	0.936035
1.10546	1.61779	0.780243		1.04274	1.30489	1.01659		0.637669	1.2581	0.549409			1.2317	0.566102	0.969516		1.71357	1.12734	1.82359		1.15553	1.22557	1.01256
1.02896	1.55256	1.12818		0.945405	1.08099	0.507172		1.12512	0.879879	0.784878			1.42701	0.673936	1.48917		1.1464	1.319	1.24173		1.00764	1.30018	1.41687
1.25196	1.58939	1.10147		1.26599	0.705983	0.775887		0.487187	0.551161	0.642699			1.18147	1.10771	1.29917		1.68772	1.09824	1.40077		2.29382	0.653684	1.00752
0.497356	1.67257	1.17421		1.08308	1.18764	0.421476		0.414191	1.01103	0.711439			0.994268	1.26505	1.25513		1.4615	1.30857	1.02397		2.82202	1.07639	1.26233
0.787098	1.53501	1.54753		1.17183	0.732403	0.514315		0.403856	0.496792	0.907282			1.31471	0.892273	1.34674		1.66326	1.29741	1.21955			0.680638	1.46781
0.966616	1.49675	1.04877		1.36318	1.09193	0.95603		1.2484	0.498453	0.47014			1.5482	1.1487	1.38166		1.69774	0.735347	1.11338			0.592733	1.60589
1.44037	1.38134	1.0517		1.23731	1.19	0.987672		1.10595	1.3069	0.766404			1.28563	1.21386	1.32126		1.45508	0.904717	1.36068			1.21052	1.87484
Activity of nonspecific esterases in midgut													Activity of glutation-s-transferases in midgut
12 hours				24 hours				48 hours					12 hours				24 hours				48 hours
Control	Bt	ABt		Control	Bt	ABt		Control	Bt	ABt			Control	Bt	ABt		Control	Bt	ABt		Control	Bt	ABt
0.724874	0.187208	0.682117		0.324692	0.459079	0.581153		0.486299	0.132284	0.481284			1.20181	0.414473	1.28652		1.11915	0.888597	1.6069		1.63882	0.357328	0.814442
0.5402	0.602858	0.616021		0.41454	0.438227	0.490698		0.566353	0.262964	0.174797			1.04307	0.819669	1.171		1.13431	0.98439	1.43344		1.26629	0.848656	1.11966
0.616306	0.244668	0.53835		0.473378	0.277258	0.586589		0.332638	0.354805	0.315527			1.23327	0.579984	0.977987		1.30464	0.888241	1.3166		1.06367	0.730994	1.13276
0.689366	0.514291	0.930541		0.37491	0.140427	0.419038		0.676084	0.378136	0.296027			1.24043	1.00168	0.929747		1.14444	0.81162	1.34299		0.971666	0.983041	0.925472
0.610417	0.525416	0.558127		0.439617	0.171386	0.631956		0.369179	0.578564	0.177601			1.17112	0.805332	1.06009		1.35034	1.18032	1.4159		1.18748	1.17646	1.24408
0.545174	0.36742	0.600746		0.385545	0.555282	0.554324		0.45594	0.34491	0.404144			1.01682	0.742045	1.05522		1.03471	0.914718	1.28943		1.24032	0.87205	1.07182
0.621285	0.582908	0.772179		0.388125	0.364806	0.473072		0.422029	0.634751	0.397287			1.11444	1.02988	1.30967		1.19668	0.845932	1.43871		1.25595	1.23606	0.888174
0.437018	0.799658	0.873999		0.363866	0.692691	0.427241		0.558657	0.340478	0.446774			0.999859	1.13965	1.2922		1.45325	0.79376	1.41673		1.1672	0.918026	0.919645
0.913624	0.718717	0.764342		0.324278	0.249121	0.391753		0.606053	0.72482	0.462907			1.29762	0.827549	1.37549		1.83998	1.02108	0.726808		1.16377	1.04489	1.14381
0.641487	0.49372	0.598219		0.547636	0.395029	0.154343		0.460131	0.349808	0.458904			0.970919	0.816274	1.23771		0.46758	0.985323	0.937916		1.06825	0.891942	1.23684
0.712062	0.380764	0.689548		0.730996	0.374424	0.695714		0.803298		0.371219
0.691698	0.424492	0.582689		0.460171	0.571895	0.570757		0.472195		0.557731
0.644775	0.301462	0.516709		0.512649	0.286475	0.509605		0.372072		0.33039
0.347179	0.53699	0.573284		0.529385	0.34556	0.701634		0.461251		0.393783
0.752284	0.214185	0.559356		0.520882	0.523257	0.500361		0.586045		0.412724
0.456895	0.405839	0.776279		0.424853		0.606199		0.501155		0.492481
0.705847	0.381629	0.509938		0.491436		0.725053		0.481963		0.408731
0.461609	0.089233	0.427539		0.80014		0.471571		0.675079		0.37106
0.62345	0.314452	0.494087		0.647317		0.474388		0.586014
0.539226	0.548925	0.560015		0.377346		0.551715		0.664826

## Sheet: Figure 5
Figure 5. ROS production in the hemolymph and midgut tissues of CPB larvae 12 and 24 hours after per os treatment with suspensions of active (Bt) and inactivated (ABt) entomopathogenic bacteria B. thuringiensis.
12 hours pt
hemolymph				midgut
Control	Bt	ABt		Control	Bt	ABt
0.627833	1.09137	0.829813		0.0358309	0.0282542	0.0172098
0.477206	0.304414	0.161403		0.120361	0.0226033	0.0126064
0.471628	0.381992	0.695967		0.0529523	0.0524651	0.0114813
0.239992	0.769231	0.363954		0.067878	0.0234837	0.0210443
0.979227	0.594512	0.979227		0.0400708	0.0330135	0.00995768
0.392118	0.617696	0.25497		0.0290027	0.0354029	0.00917062
0.588178	0.358209	0.542204		0.0216119	0.0402652	0.00813573
0.243412	1.22066	0.983442		0.0334656	0.021149	0.0188516
0.417263	0.818182	0.935894		0.0337555	0.012472	0.00926747
0.29758	0.906344	0.216029		0.019469	0.0148261	0.00862703
0.624874	0.824261	0.568006		0.0267841	0.00984052	0.0082045
0.317373	0.515807	1.07287		0.08683	0.013189	0.0132209
0.583542	1.2095	0.519509		0.0530199	0.0203441	0.00895568
0.248549	1.22873	1.35435		0.0455706	0.0145075	0.0117043
0.311003	1.33197	0.466461		0.0187651	0.0752741	0.00453207
24 hours pt
hemolymph				midgut
Control	Bt	ABt		Control	Bt	ABt
0.62287	1.58136	0.81825		0.0384106	0.0585718	0.024636
0.260309	1.42081	0.264278		0.040172	0.124066	0.0301123
0.373299	0.84525	0.398137		0.0272884	0.0554964	0.0169109
0.328394	1.52694	0.273898		0.0343217	0.120778	0.0199221
0.232407	1.7168	0.88107		0.0333243	0.18684	0.0197661
0.300393	1.21378	0.213456		0.0113966	0.146012	0.0382754
1.51143	2.07577	0.414014		0.0172439	0.152578	0.0205853
0.691286	2.33839	0.59618		0.0148795	0.090692	0.0145909
0.137262	1.94207	0.379857		0.0201486	0.142054	0.0129853
0.218179	2.12885	0.493294		0.0235169	0.155891	0.0133234
0.293898	1.43382	0.186978		0.020295	0.109331	0.0193133
0.473754	1.41092	0.119847		0.0195005	0.142038	0.0228465
0.650703	1.15624	0.340756		0.0389206	0.0973851	0.0198943
0.376609	1.59152	0.212977		0.0683682	0.145623	0.0148499
0.368176	1.80115	0.280567		0.0399093	0.0776168	0.0158816

## Sheet: Figure 6
Figure 6. Activity of peroxidase, catalase and superoxide dismutase in the hemolymph and the midgut of CPB larvae 24 hours after per os treatment with suspensions of active (Bt) and inactivated (ABt) entomopathogenic bacteria B. thuringiensis.
Activity of catalases (24 h pt)								Activity of peroxidases (24 h pt)								Activity of superoxide dismutase (24 h pt)
hemolymph				midgut				hemolymph				midgut				hemolymph				midgut
Control	Bt	ABt		Control	Bt	ABt		Control	Bt	ABt		Control	Bt	ABt		Control	Bt	ABt		Control	Bt	ABt
0.0475696	0.108164	0.0497606		0.0201727	0.047909	0.0279242		2.67296	4.8768	3.73692		1.00864	0.119772	1.17067		1.84049	1.52841	1.39037		0.545208	3.66363	1.07401
0.133339	0.0817471	0.095621		0.0269048	0.0332207	0.0328402		3.24234	3.25611	3.42385		1.33227	0.242234	1.43089		0.983254	1.76813	3.20022		0.259323	3.34739	0.725043
0.0460688	0.097117	0.0766856		0.04426	0.045235	0.0283809		3.52364	4.23932	3.03047		1.36185	0.0949936	2.55073		1.89878	2.10056	1.82475		1.14906	1.8094	1.17071
0.0377093	0.0747399	0.0308224		0.0319249	0.0425209	0.0294213		3.36691	4.59392	2.88338		1.05751	0.239746	1.02248		2.92921	2.73831	2.11282		0.964399	3.50152	0.29058
0.126176	0.0765588	0.0982082		0.0195433	0.0612765	0.0107741		4.16039	3.63406	3.60097		0.378338	0.0820668	0.343424		2.18818	1.21798	1.88232		0.238027	4.1883	0.294542
0.0439749	0.0996144	0.0562981		0.0289294	0.0344919	0.0263537		3.67434	4.70401	3.14331		0.487736	0.104708	0.798363		1.4414	2.96471	2.02321		0.298858	8.41093	0.476696
0.110172	0.147133	0.0705504		0.0437479	0.00480625	0.024676		3.46085	4.49282	3.30473		2.10785	0.228297	1.33755		1.8861	1.33996	2.38262		0.944557	2.50425	0.43995
0.086217	0.100668	0.0729502		0.0241499	0.0232537	0.026397		3.05395	2.72008	2.85965		1.17989	0.129684	0.812074		1.79186	1.85576	1.62922		0.517497	2.38189	0.750093
0.0789157	0.0834593	0.0814455		0.0258219	0.0416831	0.0307181		2.78178	3.4509	3.05134		1.06685	0.242443	1.01084		1.35636	1.61761	2.26556		0.543619	1.73938	0.341197
0.104583	0.0620583	0.0572952		0.0224171	0.0438626	0.0371051		3.16126	3.76228	3.39774		0.384826	0.170156	0.71438		1.99064	1.76963	2.56496		0.832922	0.468172	0.418686
0.124444	0.057765	0.04564		0.0572747	0.0680317	0.0217408		3.22961	4.19813	2.12987		0.481646	0.133429	0.766718		1.20634	1.32209	1.72269		0.373531	6.16537	0.59293
0.0404753	0.0894923	0.0436548						3.13683	3.24409	2.1904		1.17662	0.457088	0.615988		1.85512	1.39832	1.16796
